## **Correction: Health Is Still Social: Contemporary Examples in the Age of the Genome**

Timothy H. Holtz, Seth M. Holmes, Scott Stonington, Leon Eisenberg

Correction for:

Holtz TH, Holmes S, Stonington S, Eisenberg L (2006) Health is still social: Contemporary examples in the age of the genome. *PLoS Med* 3(10): e419. doi:10.1371/journal.pmed.0030419

One of the authors, Seth M. Holmes, was referred to as Seth Holmes in the author line and in the citation.

The correct citation is: Holtz TH, Holmes SM, Stonington S, Eisenberg L (2006) Health is still social: Contemporary examples in the age of the genome. *PLoS Med* 3(10): e419. doi:10.1371/journal.pmed.0030419

Citation: Holtz TH, Holmes SM, Stonington S, Eisenberg L (2008) Correction: Health Is Still Social: Contemporary Examples in the Age of the Genome. *PLoS Med* 5(1): e10. doi:10.1371/journal.pmed.0050010

Received: November 20, 2007; Accepted: November 20, 2007; Published: January 29, 2008.

Copyright: © 2008 Holtz et al. This is an open-access article distributed under the terms of the Creative Commons Attribution License, which permits unrestricted use, distribution, and reproduction in any medium, provided the original author and source are credited.
